# Supplementary material
Source: Springer Nature journal article supplement (https://www.springermedizin.de/resource/supplementary/12936_2010_1290_MOESM1_ESM.pdf/9549416)
Supplement: MOESM1 [file 9549416]

**Assess for eligibility**

Non-pregnant persons >5 years old with documented fever or a history of fever in the previous 24 hours

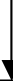

**Obtain informed consent**

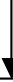

**Complete recruitment form**

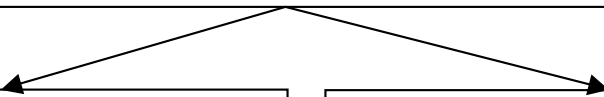

**Health centers with laboratory**

Laboratory technician performs malaria rapid diagnostic test and microscopy

**Health centers without laboratory**

Community health worker performs malaria rapid diagnostic test and collects blood slide to be read later

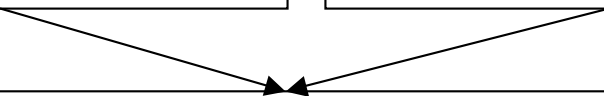

**Prescriber**

Laboratory test results available to make decisions about prescribing antimalarials

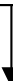

**Pharmacy**

Antimalarials dispensed from pharmacy
